# Supplementary material for: A Population-Based Longitudinal Study of Symptoms and Signs Before the Onset of Psychosis
Source: Atypon-hosted journal article supplement (doi:10.1176/appi.ajp.2017.16121384), 2017-11-28
Supplement: appi.ajp.2017.16121384.ds001.pdf [file appi.ajp.2017.16121384.ds001.pdf]

FIGURE 1. Distribution of Study Population

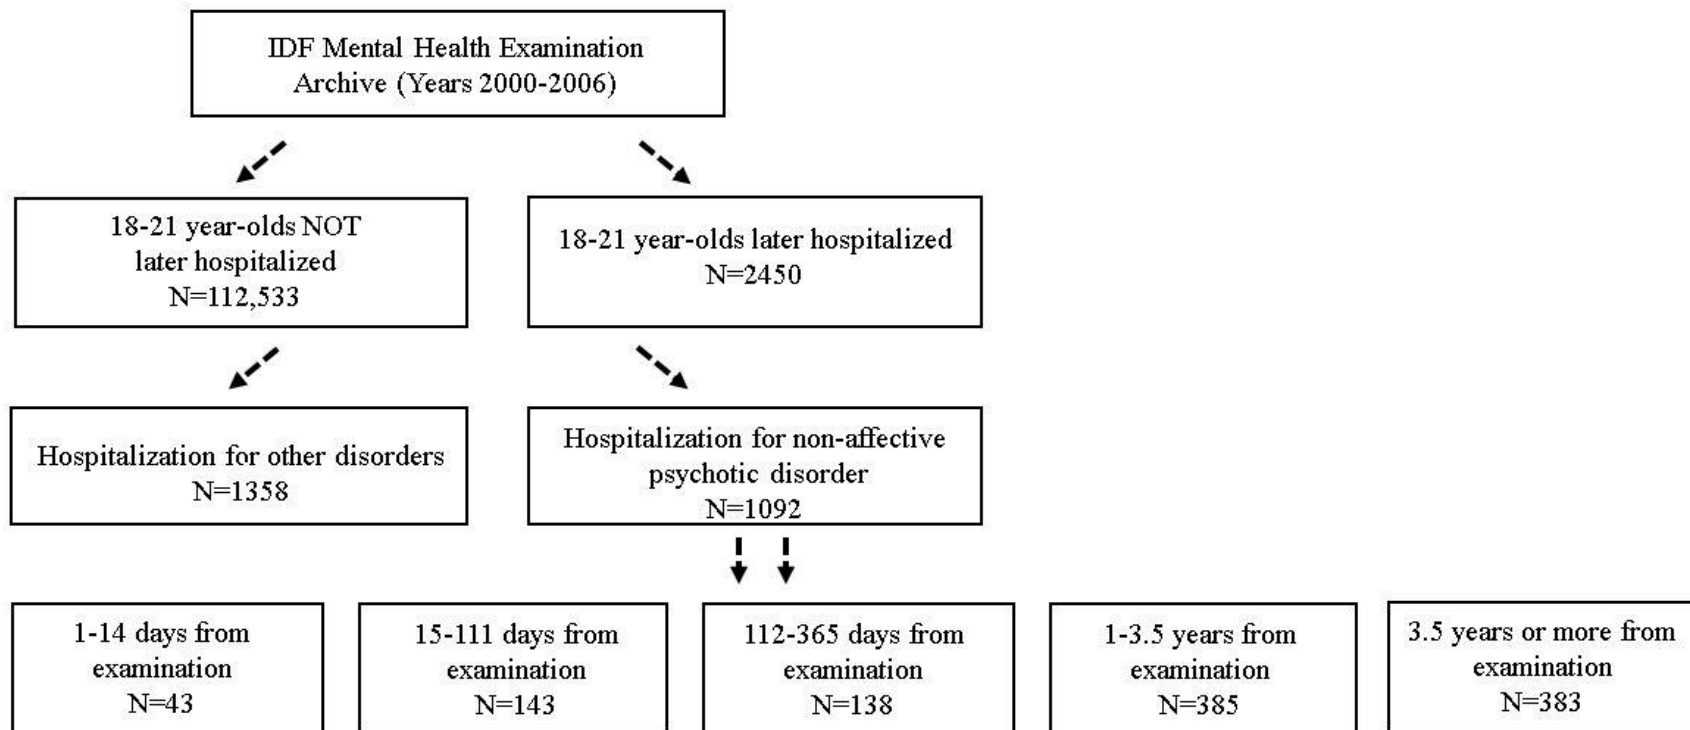

TABLE S1. Supplemental Data. Risk for hospitalization for other psychiatric disorders using clusters from principal component analysis (PCA), including positive predictive value (PPV), sensitivity and specificity, according to duration from the first mental health examination to hospitalization

A.

| Factors                                    | Hospitalization for other psychiatric disorder |                  |                      |                      | Hospitalization for other psychiatric disorder between 1-14 days from examination |                  |                      |                      | Hospitalization for other psychiatric disorder between 15-111 days from examination |                  |                      |                      |
|--------------------------------------------|------------------------------------------------|------------------|----------------------|----------------------|-----------------------------------------------------------------------------------|------------------|----------------------|----------------------|-------------------------------------------------------------------------------------|------------------|----------------------|----------------------|
|                                            | HR [95% CI]                                    | PPV [95% CI]     | Sensitivity [95% CI] | Specificity [95% CI] | HR [95% CI]                                                                       | PPV [95% CI]     | Sensitivity [95% CI] | Specificity [95% CI] | HR [95% CI]                                                                         | PPV [95% CI]     | Sensitivity [95% CI] | Specificity [95% CI] |
| Depressive symptoms                        | 1.06 [0.91-1.24]                               | 1.24 [1.18-1.31] | 52.28 [49.59-54.97]  | 49.94 [49.65-50.24]  | 1.12 [0.70-1.77]                                                                  | 0.07 [0.05-0.08] | 52.78 [40.65-64.67]  | 49.94 [49.65-50.24]  | 1.11 [0.74-1.67]                                                                    | 0.09 [0.07-0.11] | 52.69 [42.06-63.14]  | 49.94 [49.65-50.24]  |
| Risk behavior and impulse control problems | <b>2.04</b> [1.42-2.95]                        | 2.22 [1.73-2.84] | 4.27 [3.26-5.49]     | 97.73 [97.64-97.81]  | <b>5.36</b> [2.57-11.19]                                                          | 0.31 [0.16-0.60] | 11.11 [4.92-20.72]   | 97.73 [97.64-97.81]  | <b>2.96</b> [1.30-6.77]                                                             | 0.23 [0.11-0.51] | 6.45 [2.40-13.52]    | 97.73 [97.64-97.81]  |
| Psychotic symptoms                         | <b>3.14</b> [2.25-4.38]                        | 4.35 [3.58-5.27] | 6.77 [5.50-8.24]     | 98.20 [98.12-98.28]  | <b>20.88</b> [12.47-34.97]                                                        | 0.98 [0.67-1.42] | 27.78 [17.86-39.59]  | 98.20 [98.12-98.28]  | <b>3.10</b> [1.26-7.63]                                                             | 0.25 [0.11-0.58] | 5.38 [1.77-12.10]    | 98.20 [98.12-98.28]  |
| Other symptoms                             | <b>1.46</b> [1.17-1.83]                        | 1.62 [1.43-1.83] | 15.17 [13.30-17.19]  | 88.86 [88.67-89.04]  | 1.60 [0.86-2.96]                                                                  | 0.10 [0.06-0.16] | 16.67 [8.92-27.30]   | 88.86 [88.67-89.04]  | <b>1.78</b> [1.05-3.02]                                                             | 0.14 [0.09-0.21] | 18.28 [11.02-27.65]  | 88.86 [88.67-89.04]  |

B.

| Factors                                    | Hospitalization for other psychiatric disorder 112-365 days from examination |                  |                      |                      | Hospitalization for other psychiatric disorder between 1-3.5 years from examination |                  |                      |                      | Hospitalization for other psychiatric disorder 3.5 years or more from examination |                  |                      |                      |
|--------------------------------------------|------------------------------------------------------------------------------|------------------|----------------------|----------------------|-------------------------------------------------------------------------------------|------------------|----------------------|----------------------|-----------------------------------------------------------------------------------|------------------|----------------------|----------------------|
|                                            | HR [95% CI]                                                                  | PPV [95% CI]     | Sensitivity [95% CI] | Specificity [95% CI] | HR [95% CI]                                                                         | PPV [95% CI]     | Sensitivity [95% CI] | Specificity [95% CI] | HR [95% CI]                                                                       | PPV [95% CI]     | Sensitivity [95% CI] | Specificity [95% CI] |
| Depressive symptoms                        | 0.99 [0.75-1.33]                                                             | 0.16 [0.14-0.19] | 50.00 [42.60-57.40]  | 49.94 [50.24]        | 0.99 [0.85-1.18]                                                                    | 0.50 [0.46-0.54] | 50.27 [46.05-54.48]  | 49.94 [50.24]        | 0.90 [0.75-1.08]                                                                  | 0.40 [0.36-0.43] | 48.91 [44.24-53.59]  | 49.94 [50.24]        |
| Risk behavior and impulse control problems | 1.43 [0.64-3.23]                                                             | 0.23 [0.11-0.51] | 3.23 [1.19-6.89]     | 97.73 [97.81]        | <b>2.36 [1.63-3.41]</b>                                                             | 1.16 [0.82-1.64] | 5.35 [3.64-7.55]     | 97.73 [97.81]        | <b>1.93 [1.27-2.94]</b>                                                           | 0.89 [0.60-1.32] | 5.02 [3.21-7.44]     | 97.73 [97.81]        |
| Psychotic symptoms                         | <b>3.42 [1.86-6.30]</b>                                                      | 0.54 [0.30-0.96] | 5.91 [2.99-10.34]    | 98.20 [98.28]        | <b>2.39 [1.59-3.60]</b>                                                             | 5.77 [4.94-6.73] | 18.76 [15.85-21.95]  | 98.20 [98.28]        | <b>1.87 [1.18-2.97]</b>                                                           | 0.93 [0.60-1.44] | 4.15 [2.52-6.40]     | 98.20 [98.28]        |
| Other symptoms                             | 1.47 [0.99-2.19]                                                             | 0.23 [0.17-0.31] | 33.72 [23.88-44.72]  | 88.86 [89.04]        | <b>1.38 [1.09-1.74]</b>                                                             | 0.65 [0.53-0.79] | 14.62 [11.80-17.82]  | 88.86 [89.04]        | <b>1.64 [1.28-2.12]</b>                                                           | 0.56 [0.45-0.70] | 15.50 [12.31-19.15]  | 88.86 [89.04]        |
